# Supplementary material for: Population Structure and Diversity in European Honey Bees (Apis mellifera L.)—An Empirical Comparison of Pool and Individual Whole-Genome Sequencing
Source: MDPI journal article supplement (doi:10.3390/genes13020182), 2022-01-21
Supplement: s1 [file s1]

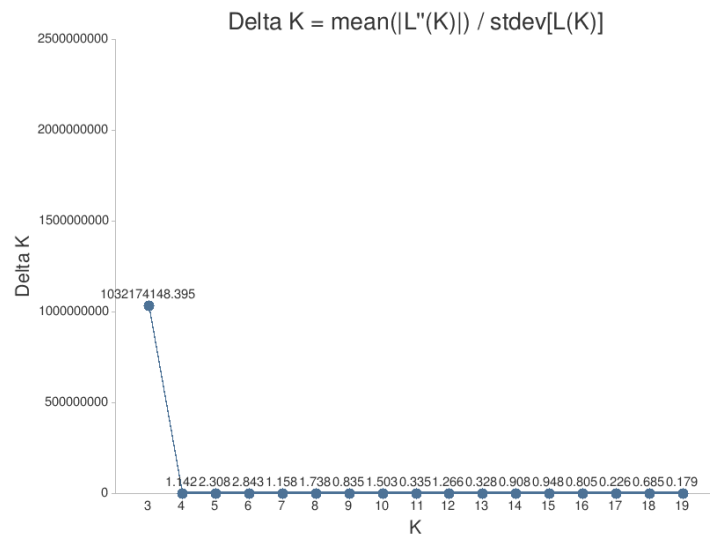

**Figure S1.** Delta k plot of Evanno's test based on NGSadmixmap analysis for K = 2 - 20.

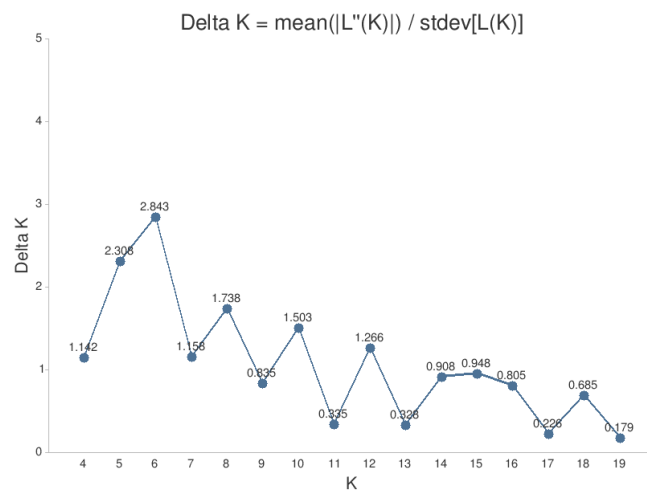

**Figure S2.** Delta K plot of Evanno's test based on NGSadmixmap analysis for K = 3 - 20.
